# Supplementary material for: Copper (II) Heterocyclic Thiosemicarbazone Complexes as Single-Source Precursors for the Preparation of Cu9S5 Nanoparticles: Application in Photocatalytic Degradation of Methylene Blue
Source: MDPI journal article supplement (doi:10.3390/catal12010061), 2022-01-06
Supplement: s1 [file s1]

# Copper(II) Heterocyclic Thiosemicarbazone Complexes as Single-Source Precursors for the Preparation of Cu<sub>9</sub>S<sub>5</sub> Nanoparticles: Application in Photocatalytic Degradation of Methylene Blue

Adrien P. Yepseu<sup>1,2</sup>, Thomas Girardet<sup>2</sup>, Linda D. Nyamen<sup>1</sup>, Solenne Fleutot<sup>2</sup>, Kevin I.Y. Ketchemen<sup>1</sup>, Franck Cleymand<sup>2\*</sup> and Peter T. Ndifon<sup>1\*</sup>

<sup>1</sup>Department of Inorganic Chemistry, Faculty of Science, University of Yaounde I, P.O. Box 812, Yaounde, Cameroon.

<sup>2</sup>Institut Jean Lamour UMR 7198 CNRS – Université de Lorraine Campus Artem, 2 allée André Guinier, 54000 Nancy, France.

\*Corresponding Authors: franck.cleymand@univ-lorraine.fr (F.C.); pndifon@facsciences-uy1.cm (P.T.N.)

## Supplementary Data

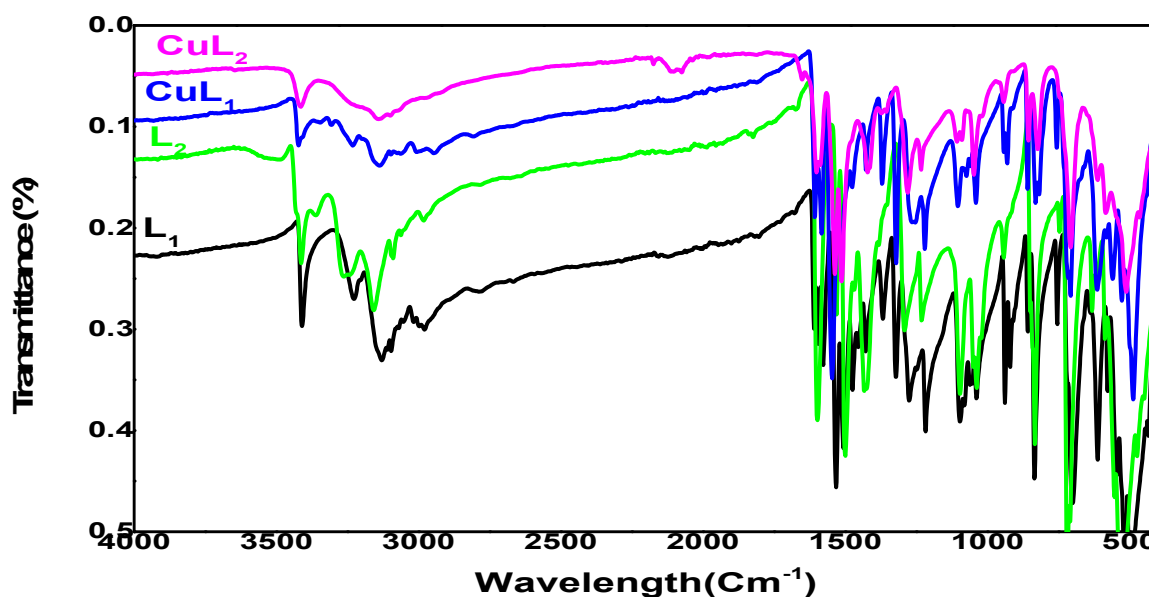

ESI Figure S1: Infrared spectra of ligands and their corresponding complexes.

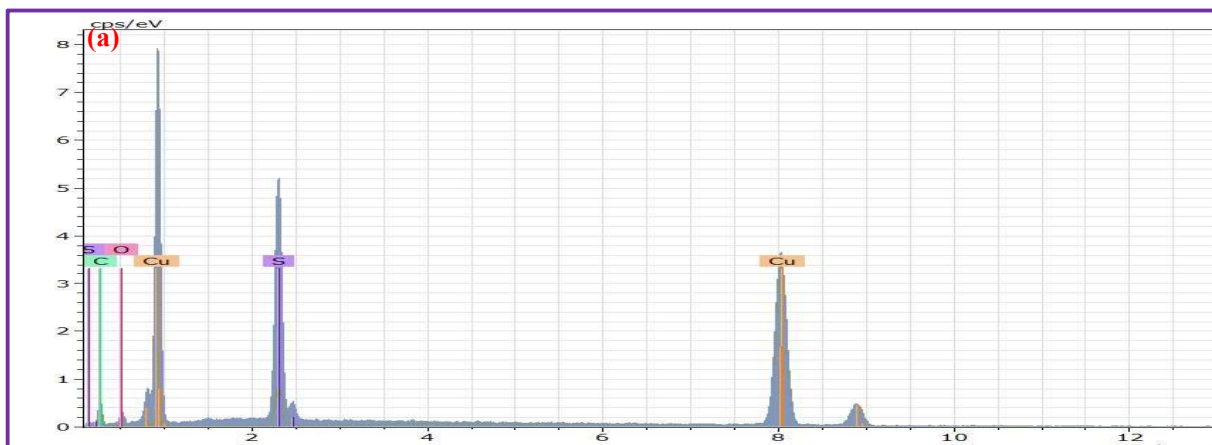

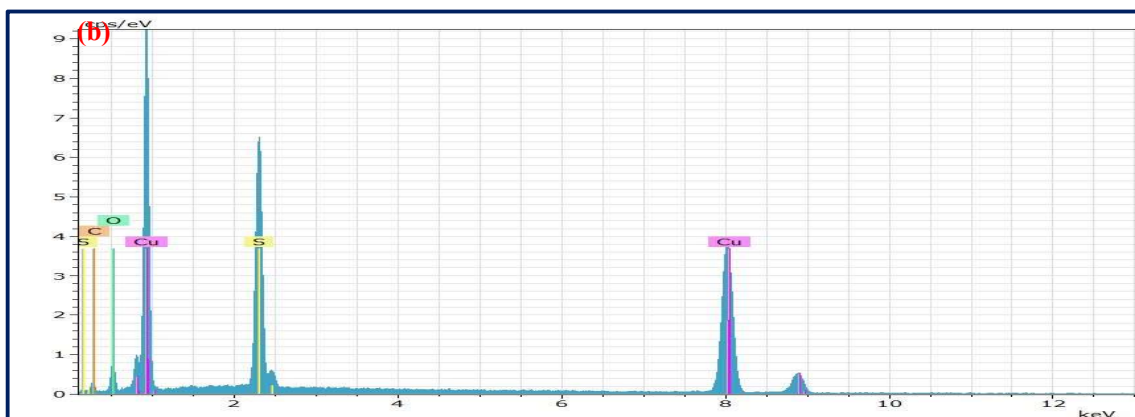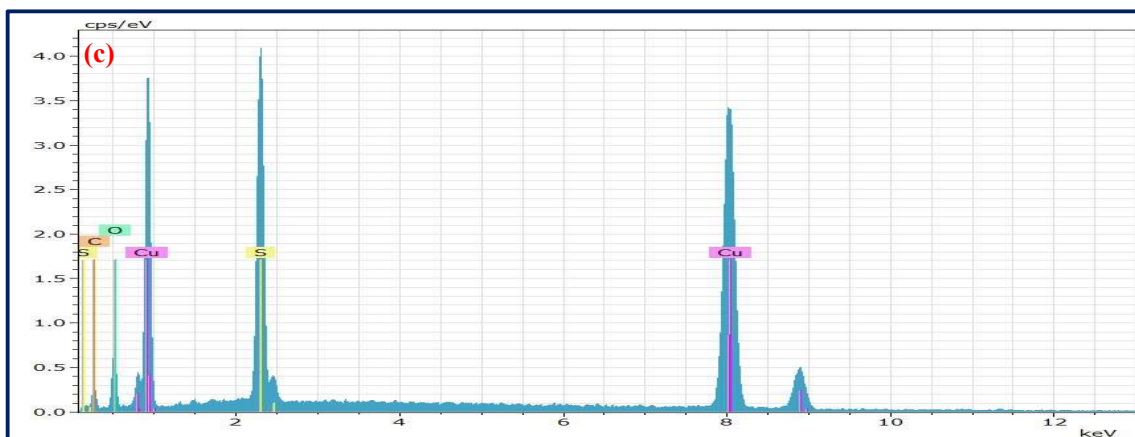

**ESI Figure S2:** EDX spectra of  $\text{Cu}_x\text{S}_y$  nanoparticles prepared in (a) OLA, (b) HDA and (c) DDA at 190 °C using complex (2).

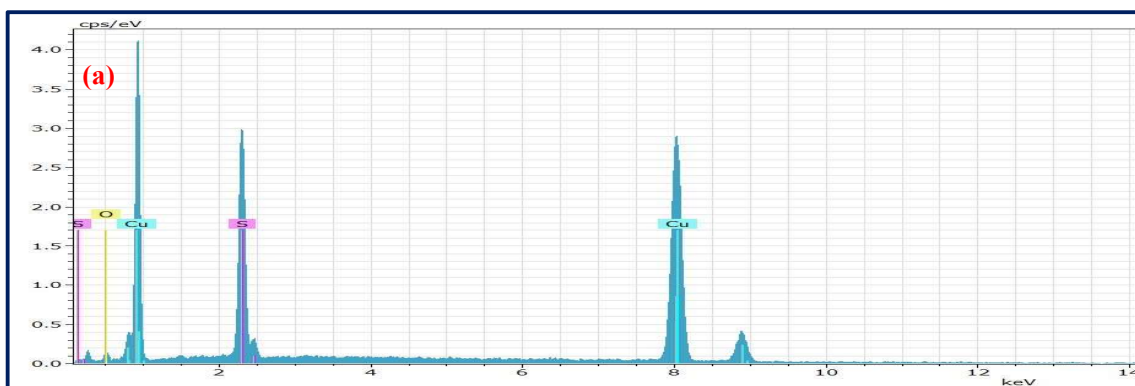

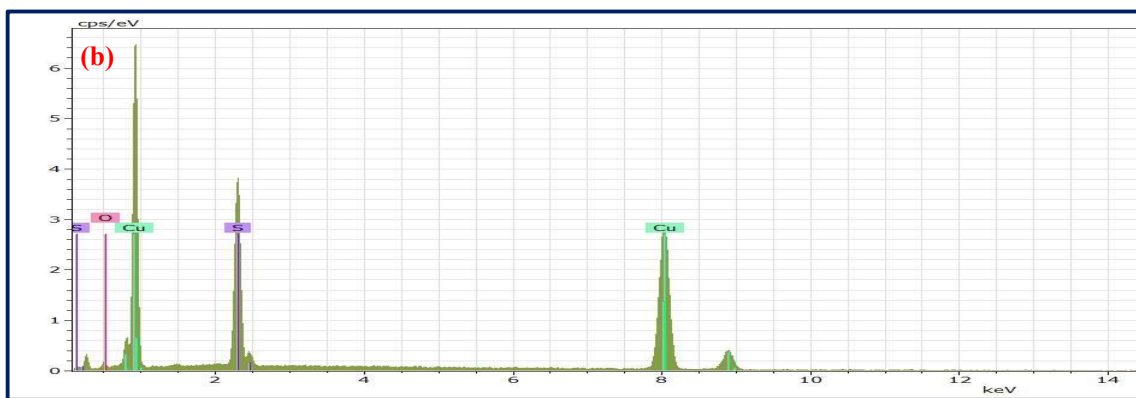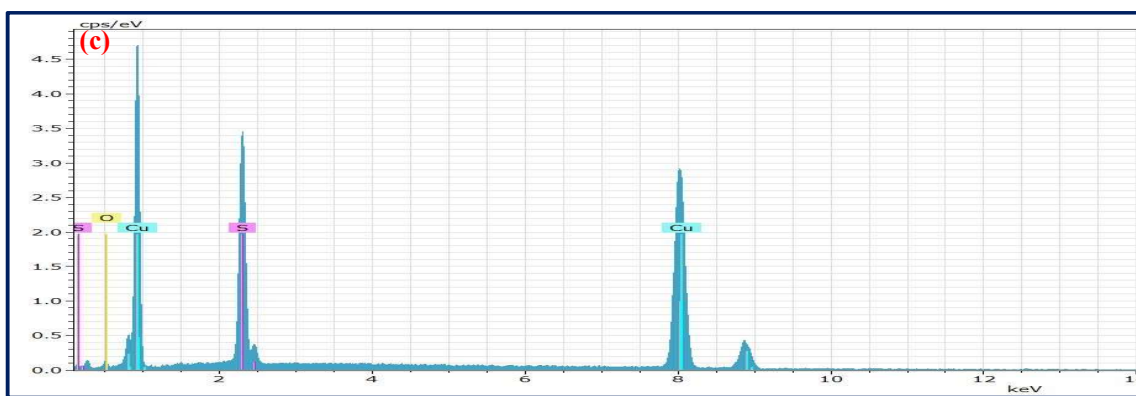

**ESI Figure S3:** EDX spectra of  $\text{Cu}_x\text{S}_y$  nanoparticles prepared in (a) OLA, (b) HAD and (c) DDA at 230 °C using complex (1).

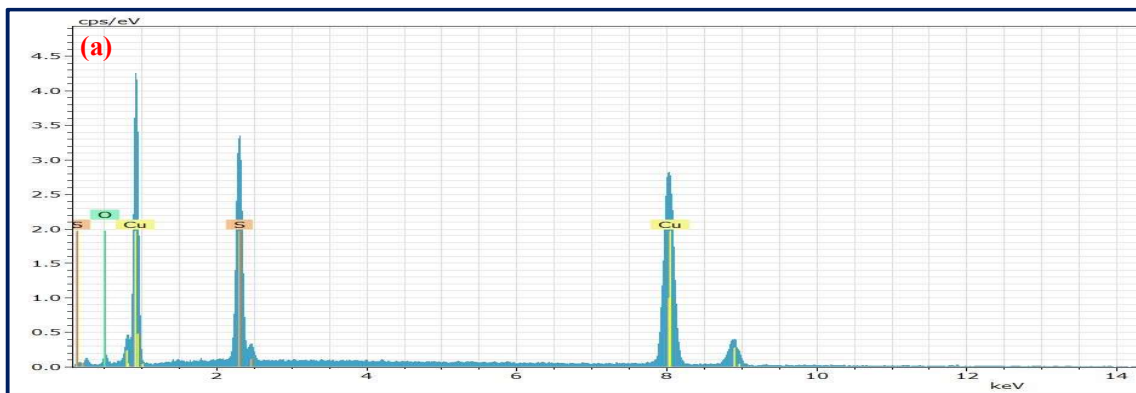

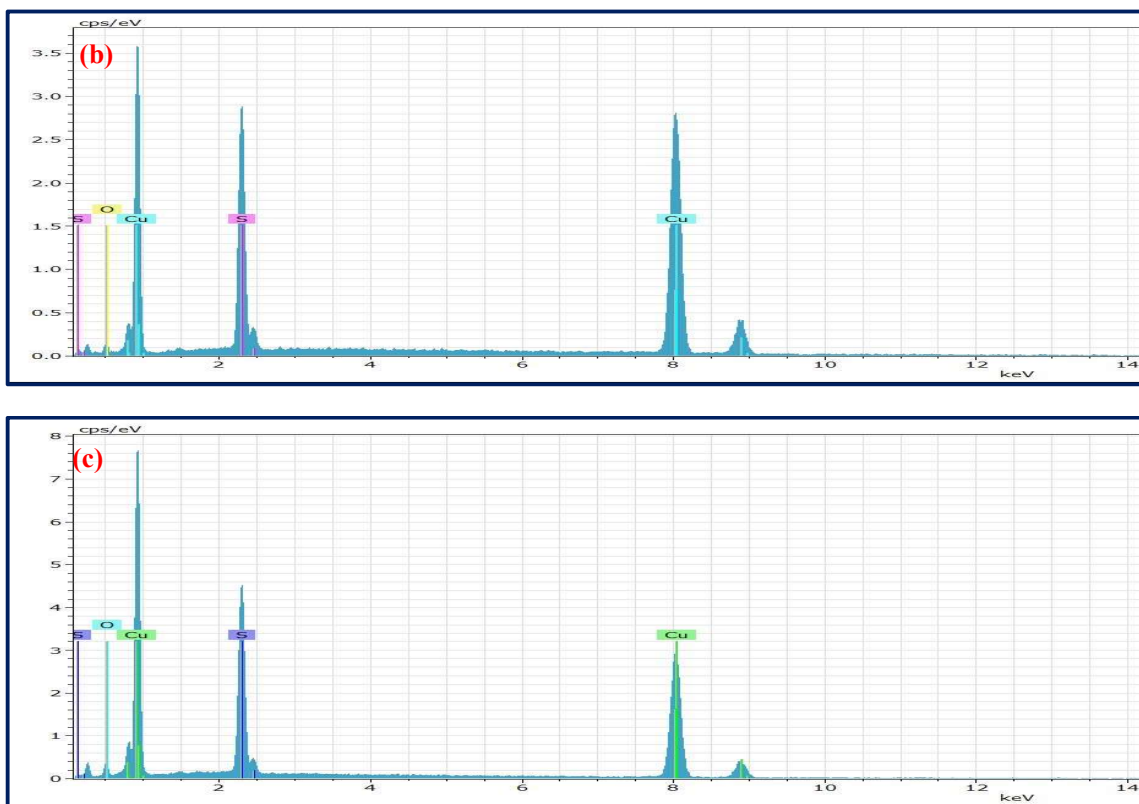

**ESI Figure S4:** EDX spectra of  $\text{Cu}_x\text{S}_y$  nanoparticles prepared in (a) OLA, (b) HAD and (c) DDA at 230 °C using complex (2).

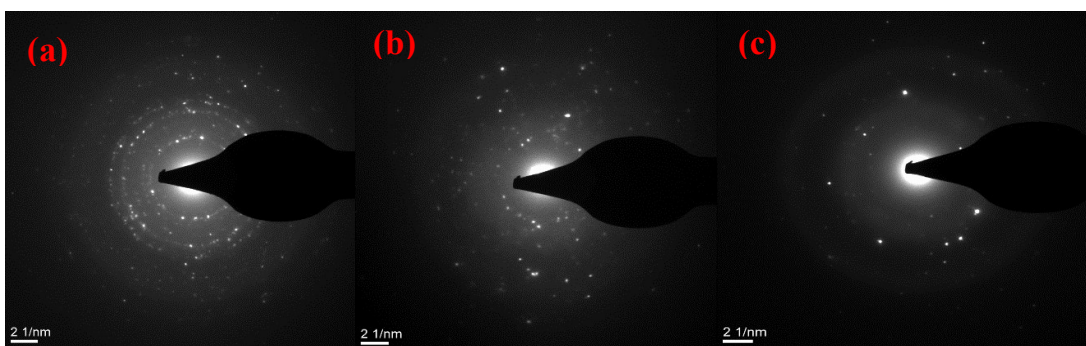

**ESI Figure S5:** SAED patterns of  $\text{Cu}_x\text{S}_y$  nanoparticles prepared at 190 °C in (a) OLA, (b) HDA and (c) DDA using complex (2).

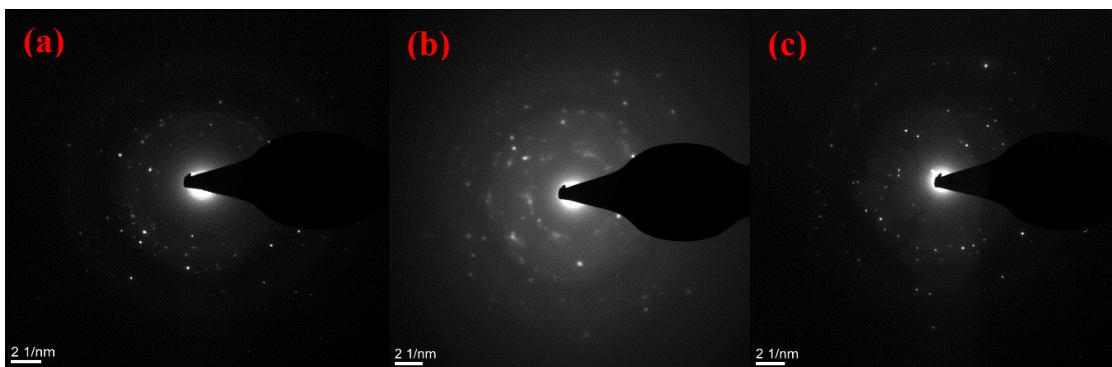

**ESI Figure S6:** SAED patterns of  $\text{Cu}_x\text{S}_y$  nanoparticles prepared at 230 °C in (a) OLA, (b) HDA and (c) DDA using complex **(2)**.

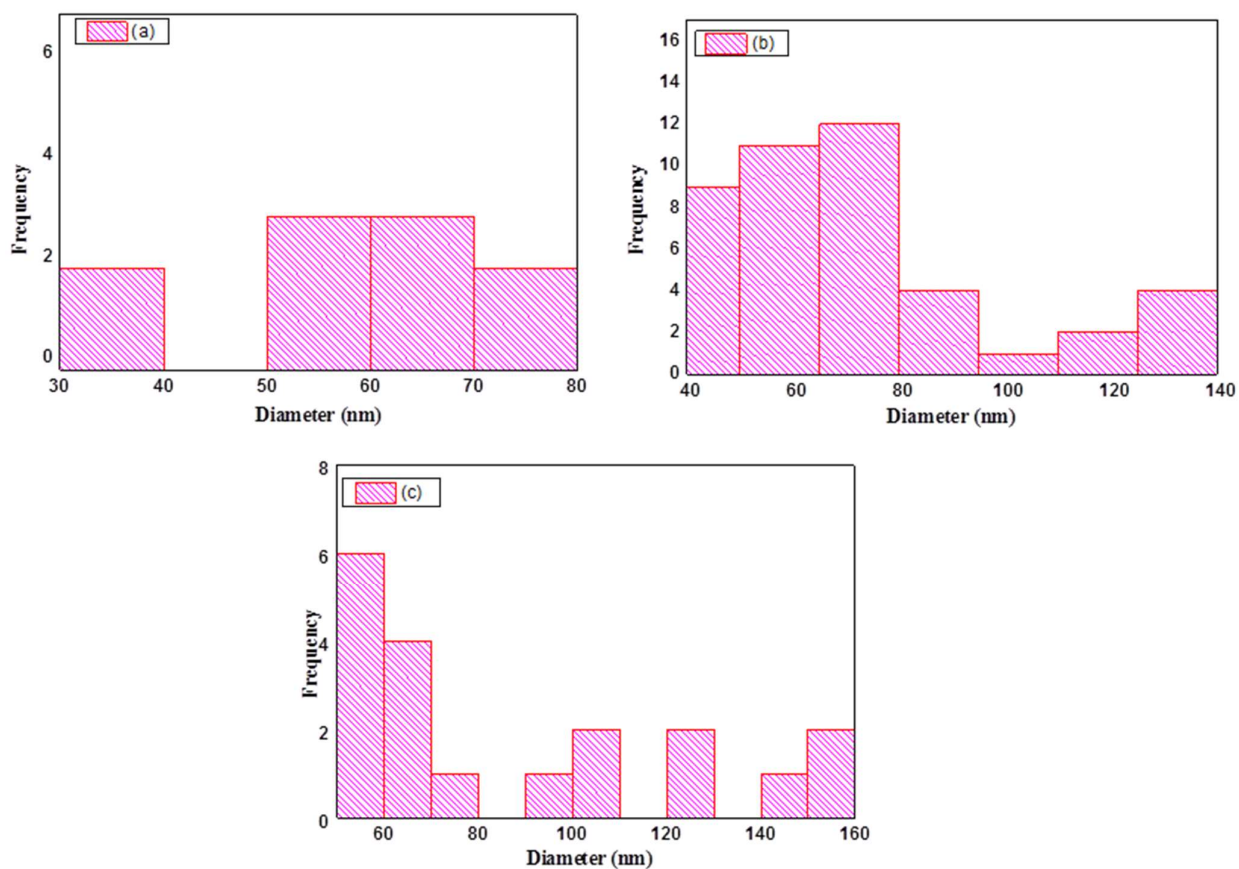

**ESI Figure S7:** Particle size distribution for  $\text{Cu}_x\text{S}_y$  nanoparticles prepared in (a) OLA, (b) HDA and (c) DDA using complex **(1)** at 190 °C.

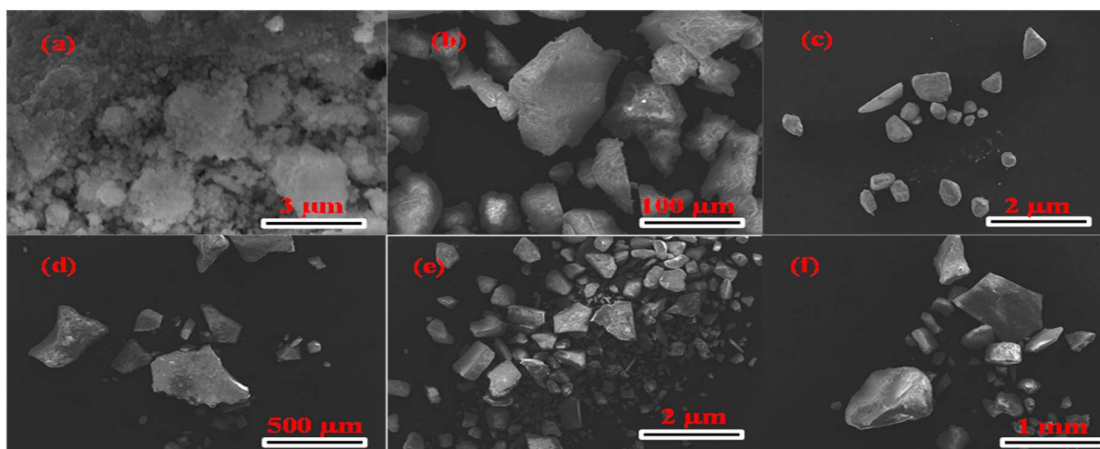

**ESI Figure S8:** SEM images of  $\text{Cu}_x\text{S}_y$  nanoparticles prepared in (a, d) OLA, (b, e) HDA and (c, f) DDA at 230 °C using the complexes (1) and (2) as precursors.

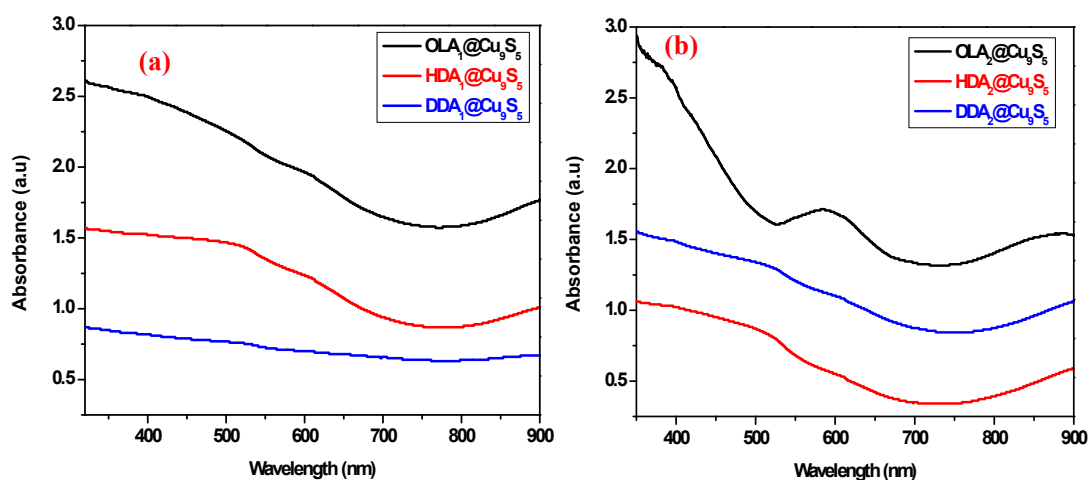

**ESI Figure S9:** UV-vis-NIR of  $\text{Cu}_x\text{S}_y$  nanoparticles prepared in OLA, HAD and DDA at 190 °C using (a) complex (1) and (b) complex (2) as single source precursors.

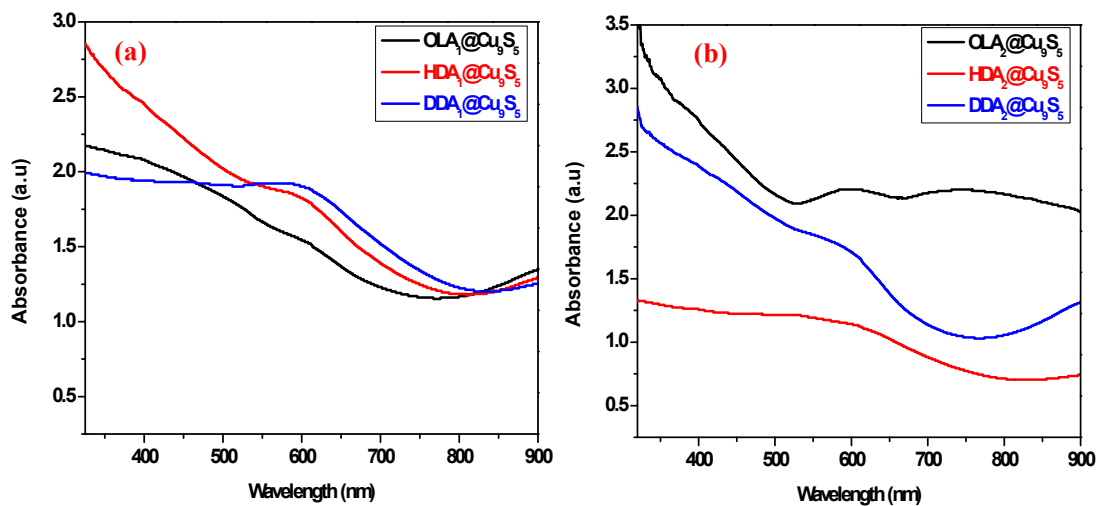



**ESI Figure S10:** UV-visible-NIR of  $\text{Cu}_x\text{S}_y$  nanoparticles prepared in OLA, HDA and DDA at 230 °C using (a) complex (1) and (b) complex (2) as single source precursors.

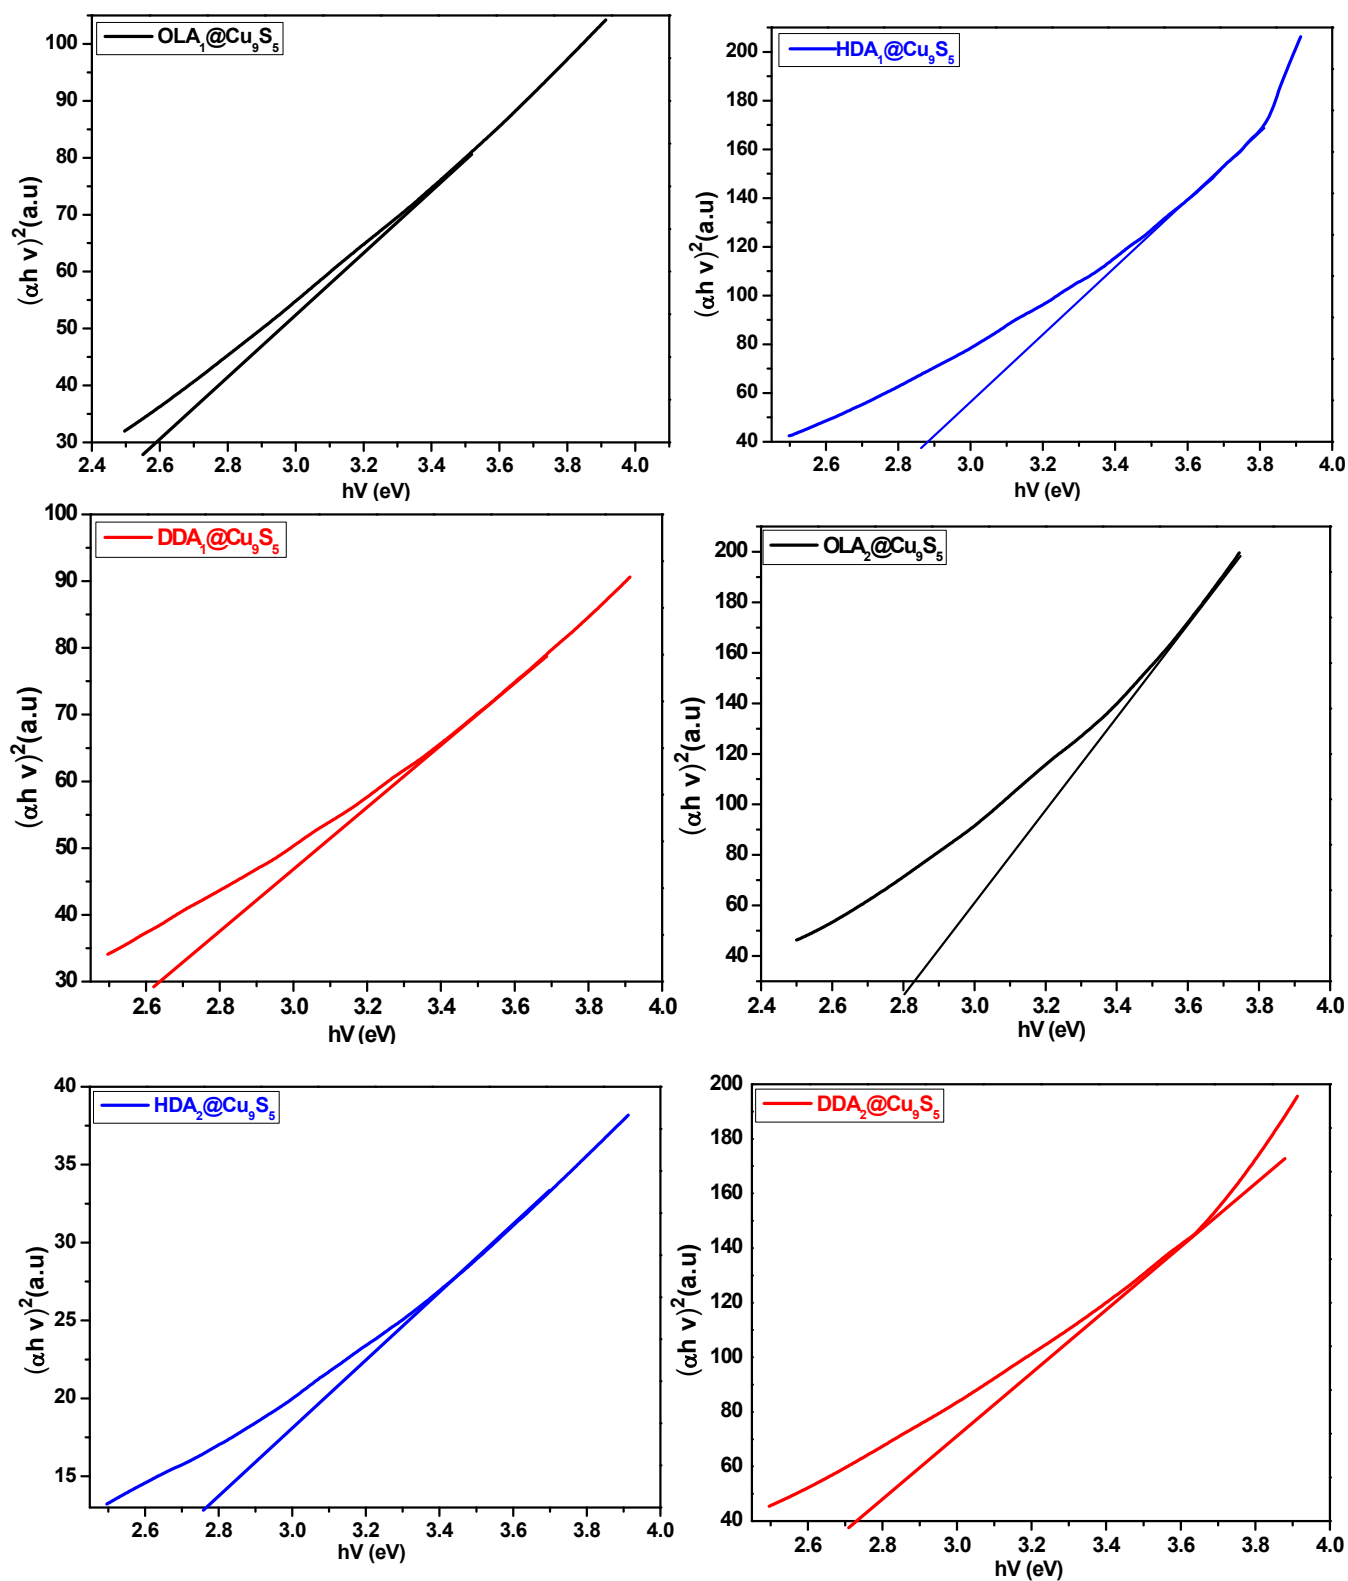

**SI Figure S11:** Tauc plots of  $\text{Cu}_x\text{S}_y$  nanoparticles prepared in OLA, HDA, and DDA at 230 °C using complexes (1) and (2).

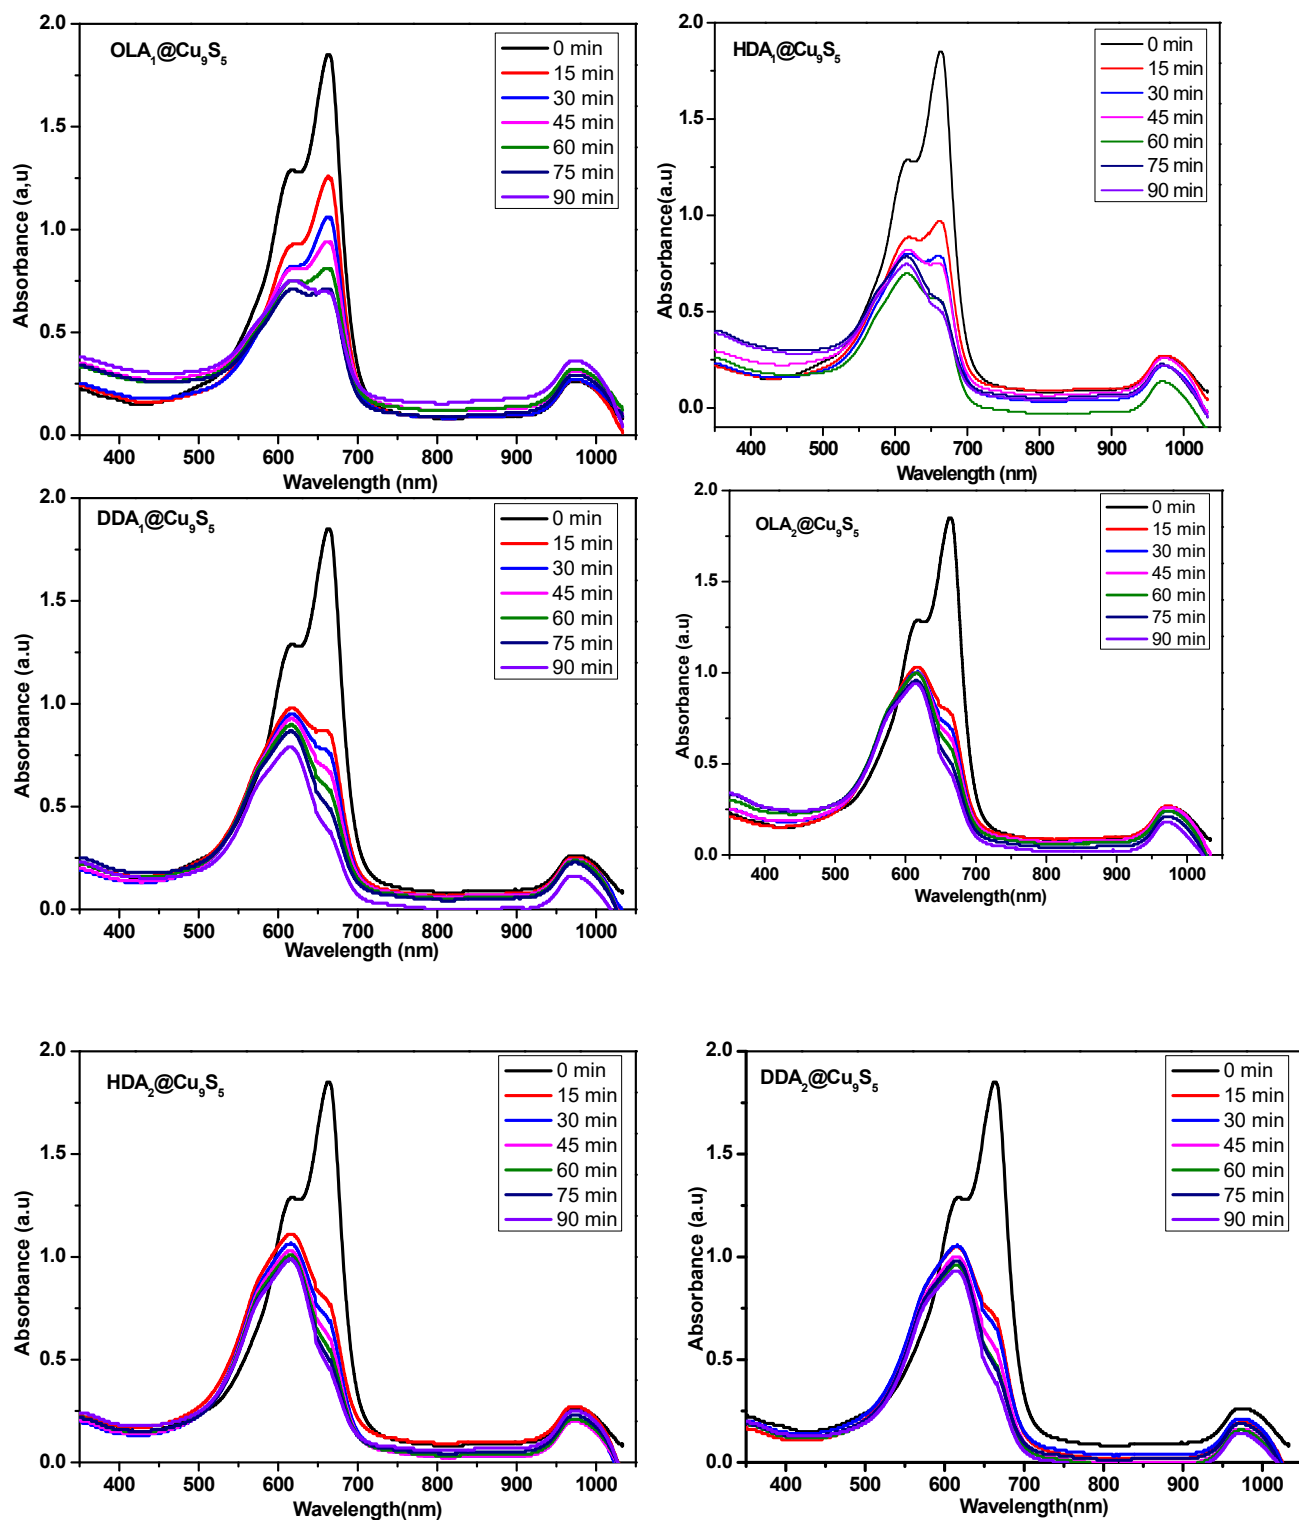



**ESI Figure S12:** UV-Vis absorption spectra for methylene blue photodegradation using copper sulfide nanoparticles synthesized at 190 °C.

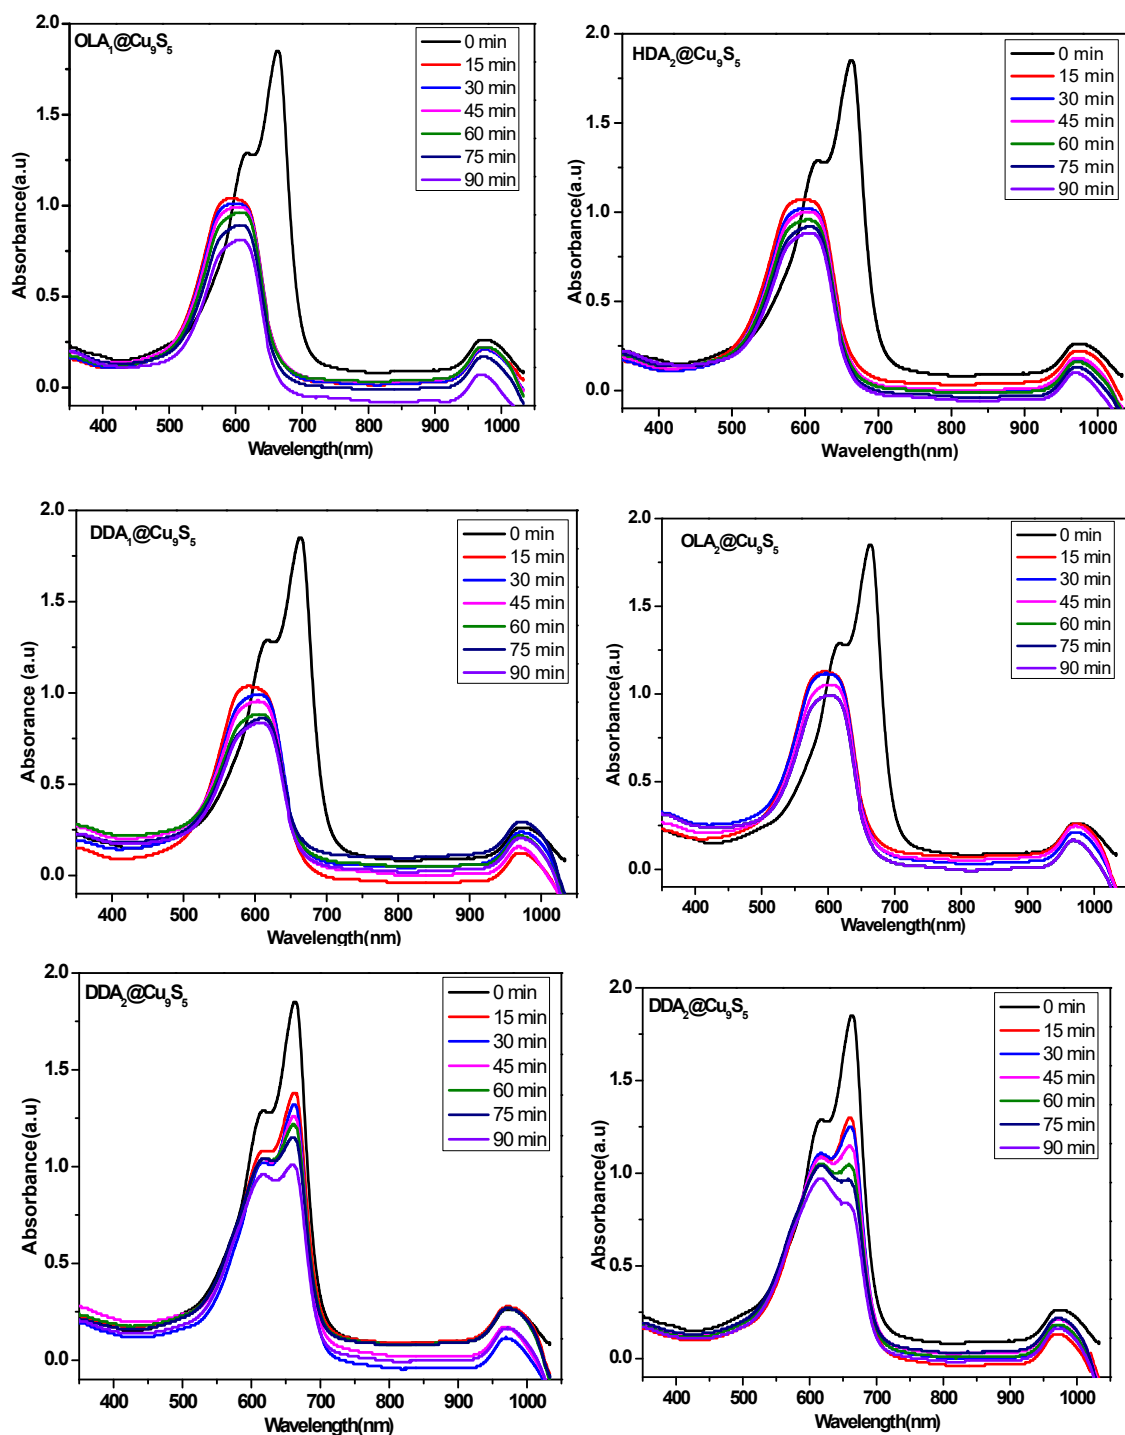

**ESI Figure S13:** UV-Vis absorption spectra for methylene blue photodegradation using Cu<sub>x</sub>S<sub>y</sub> nanoparticles synthesized at 230 °C.
